# Supplementary material for: Changes in gene expression shift and switch genetic interactions
Source: bioRxiv or medRxiv preprint supplement (doi:10.1101/578419), 2019-03-15
Supplement: Supplementary file [file media-1.pdf]

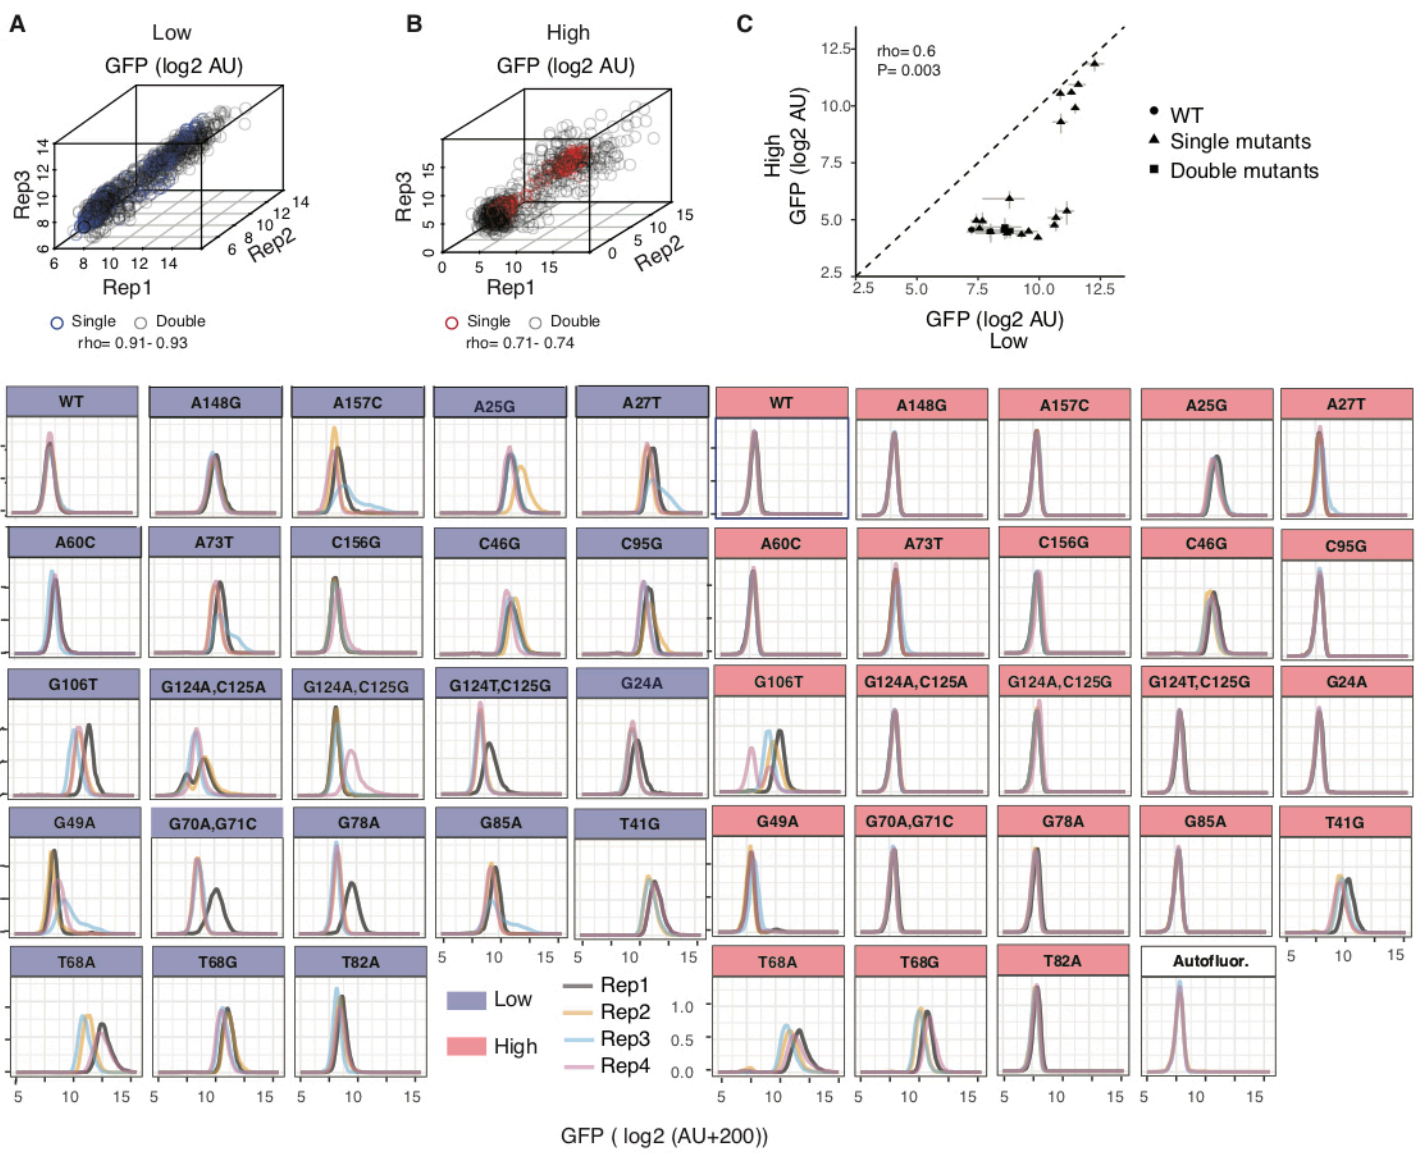

Figure S1

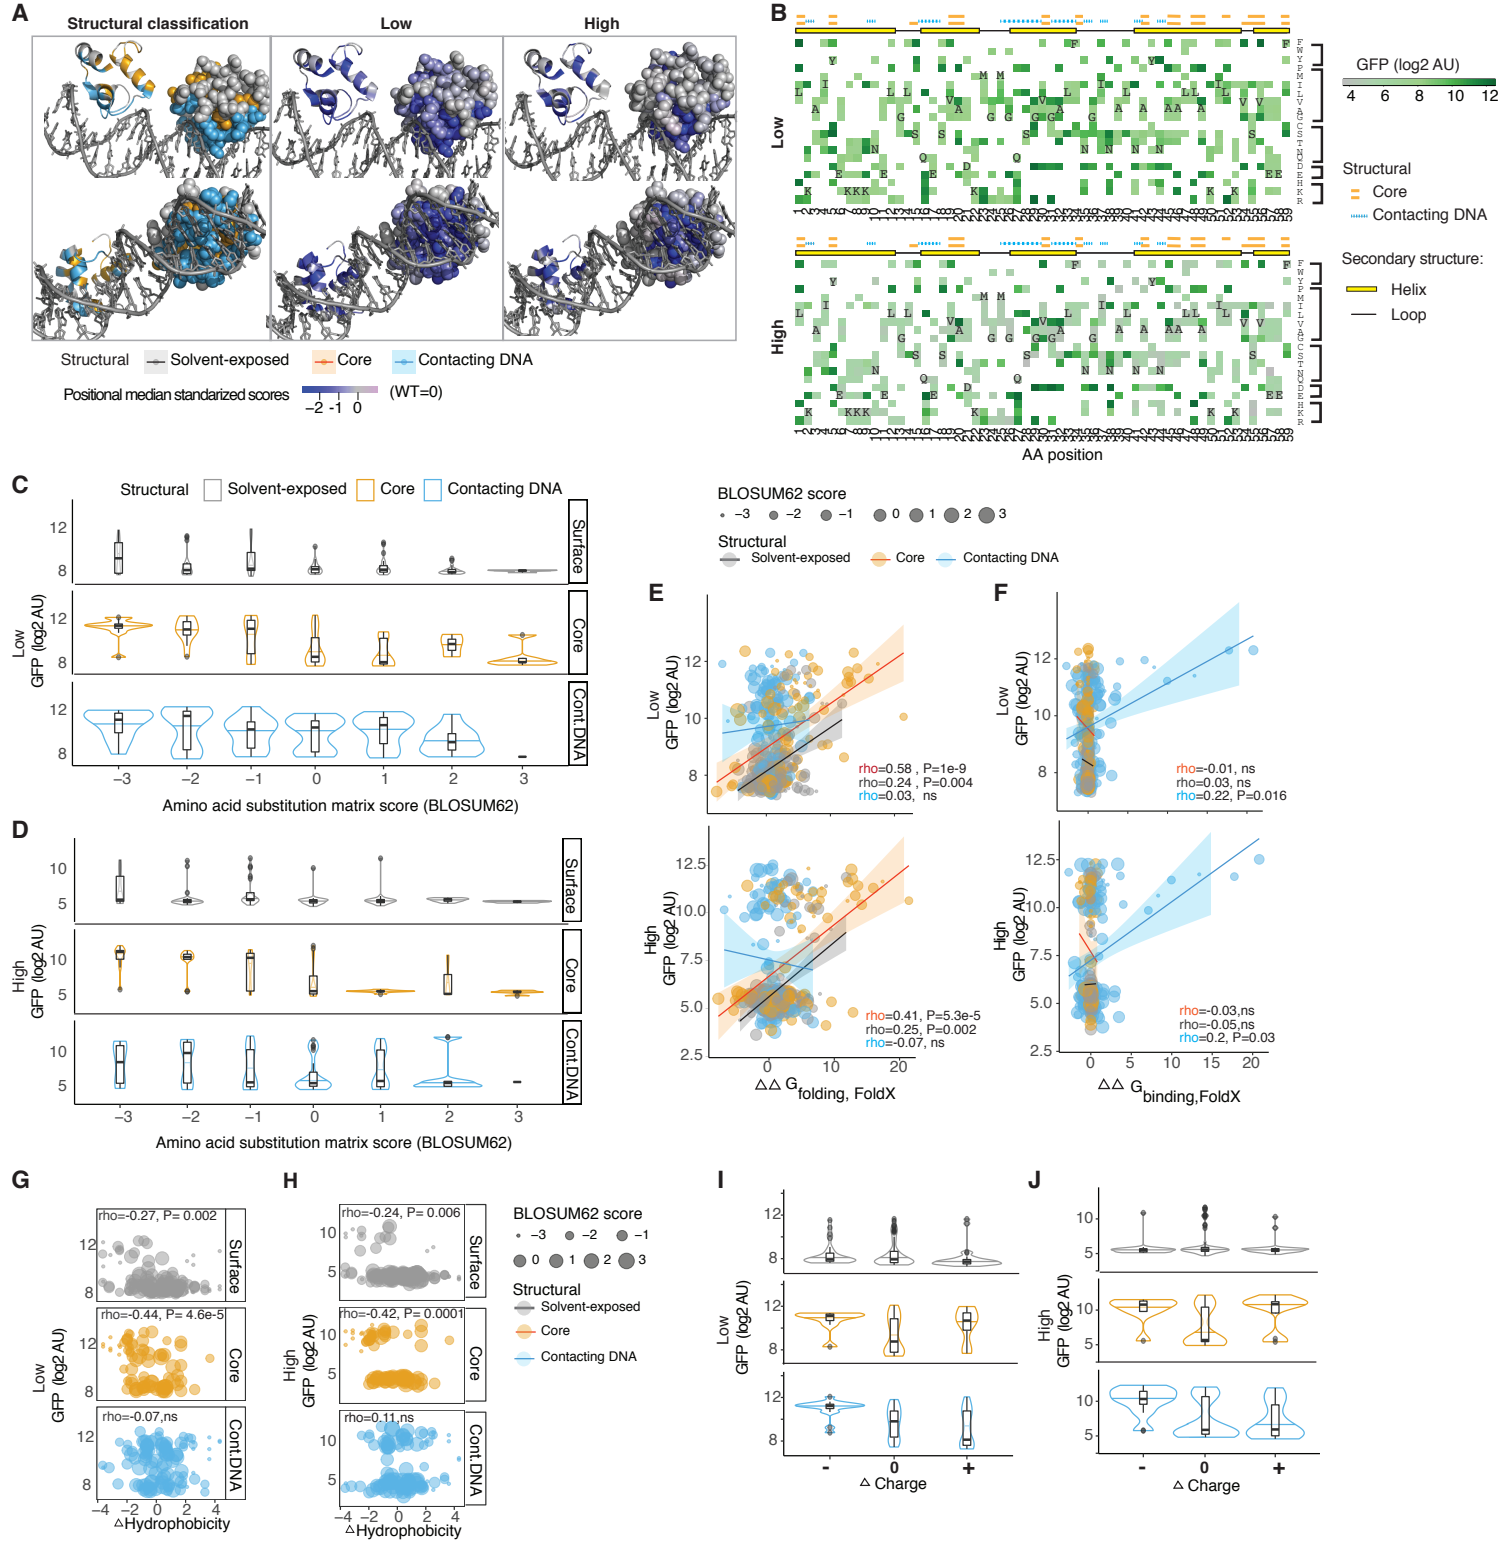

Figure S2

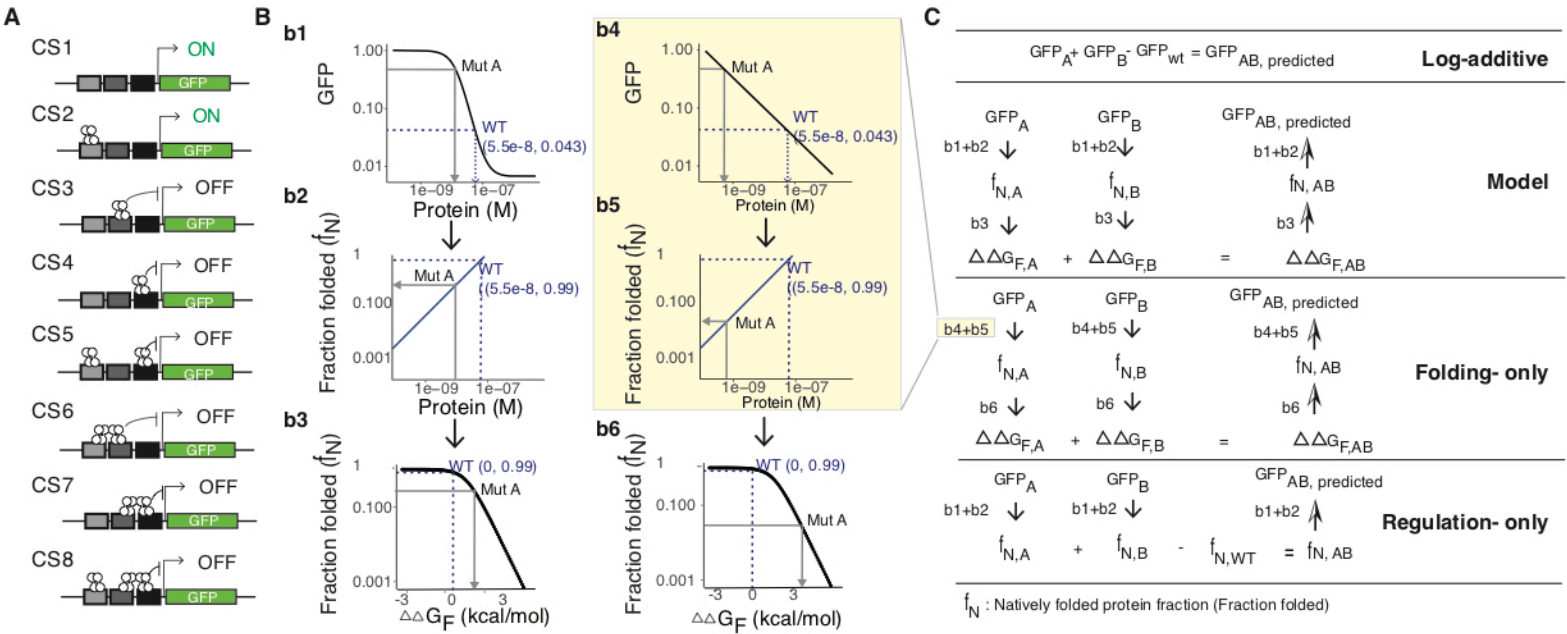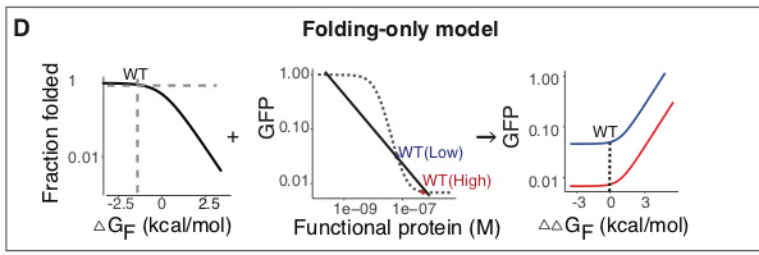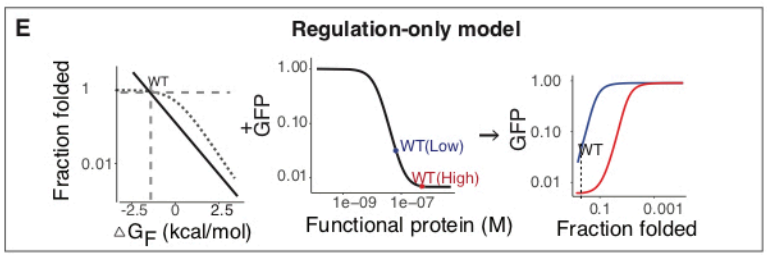

Figure S3

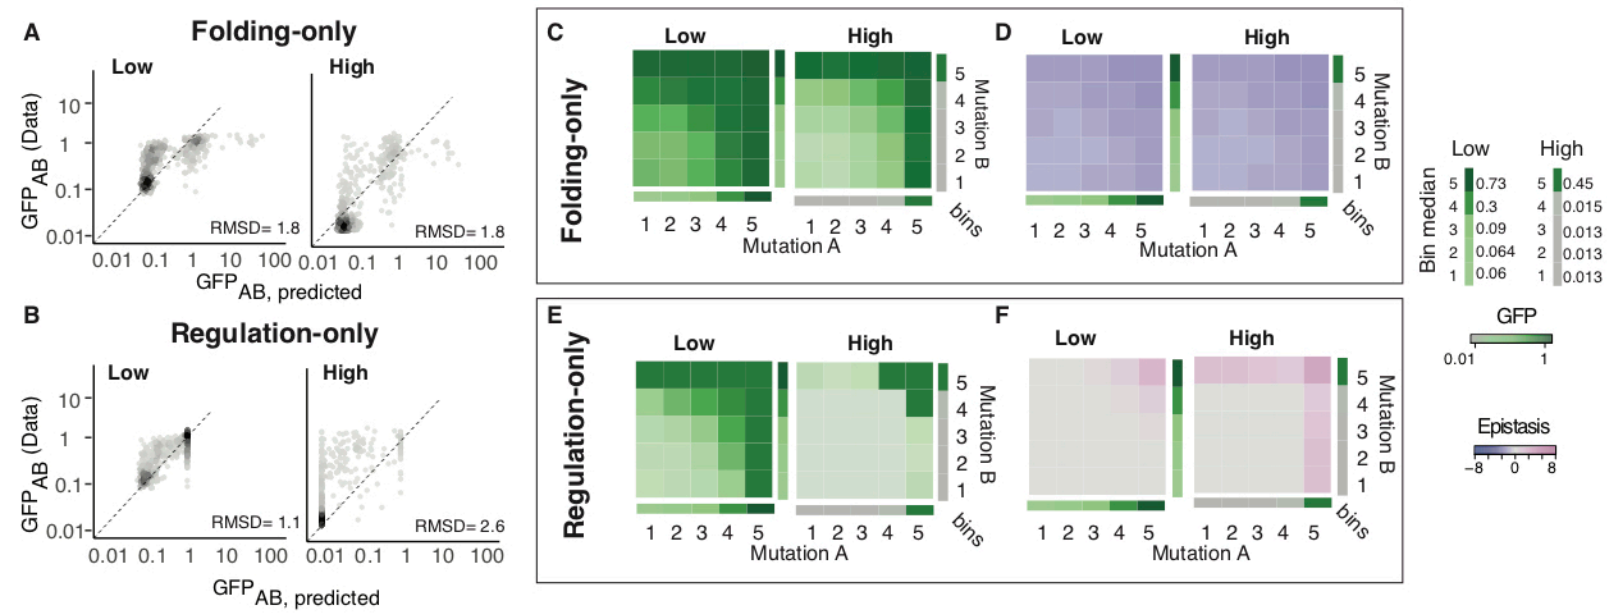

Figure S4

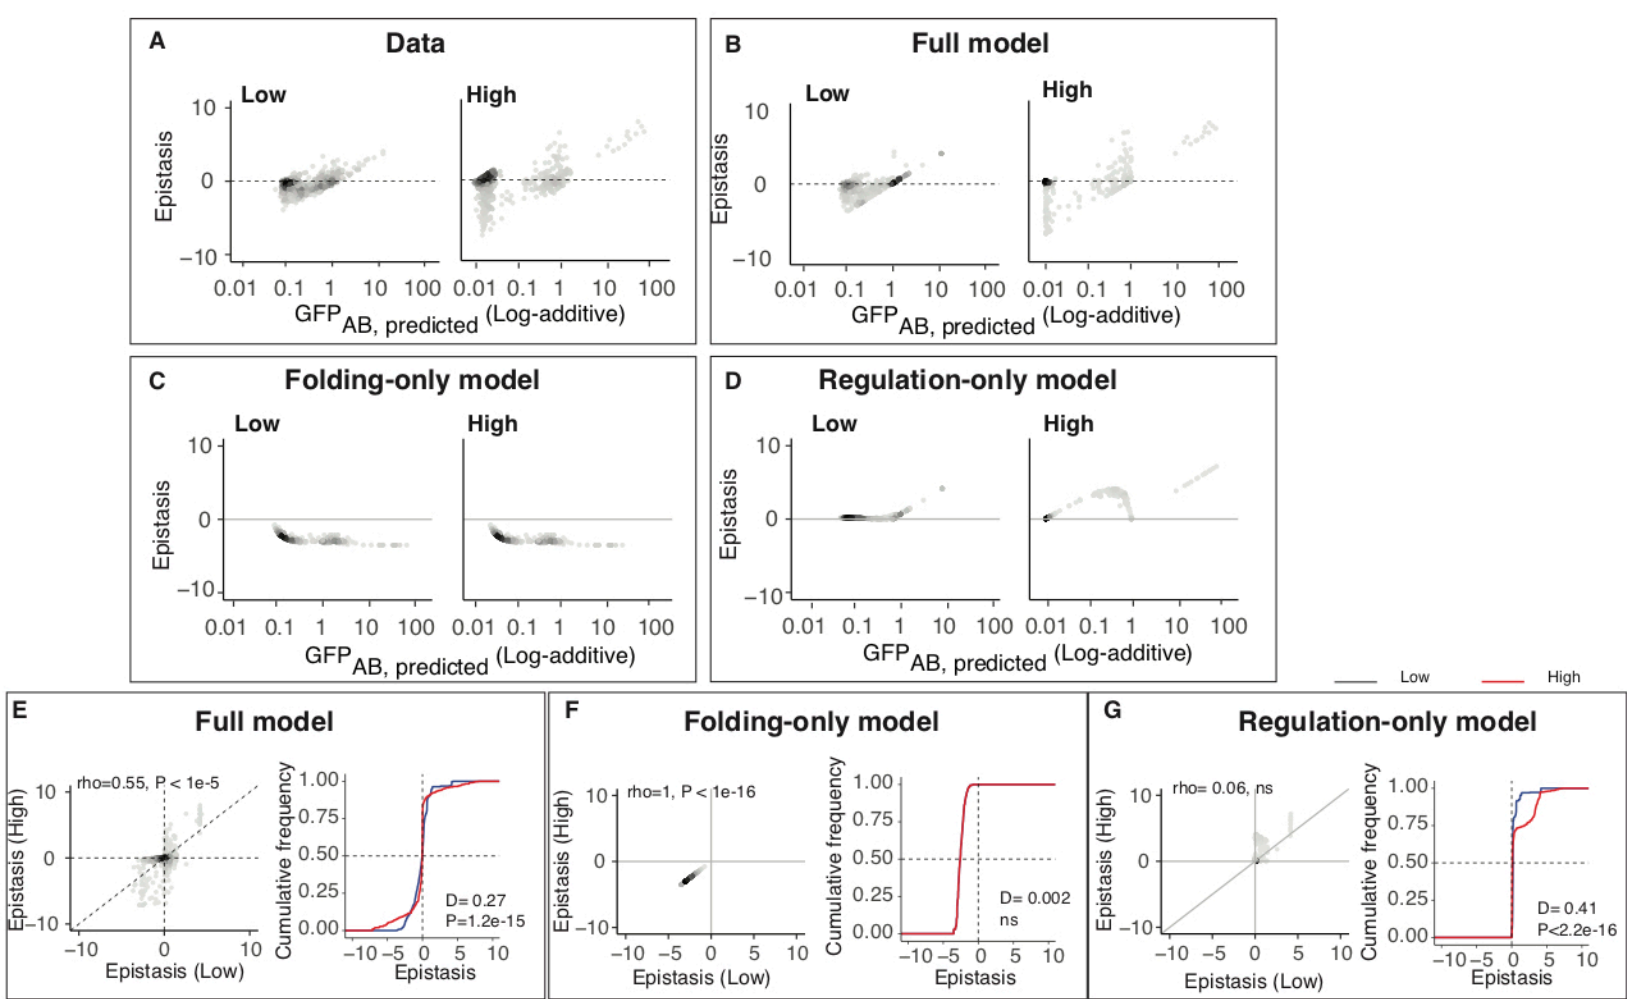

Figure S5

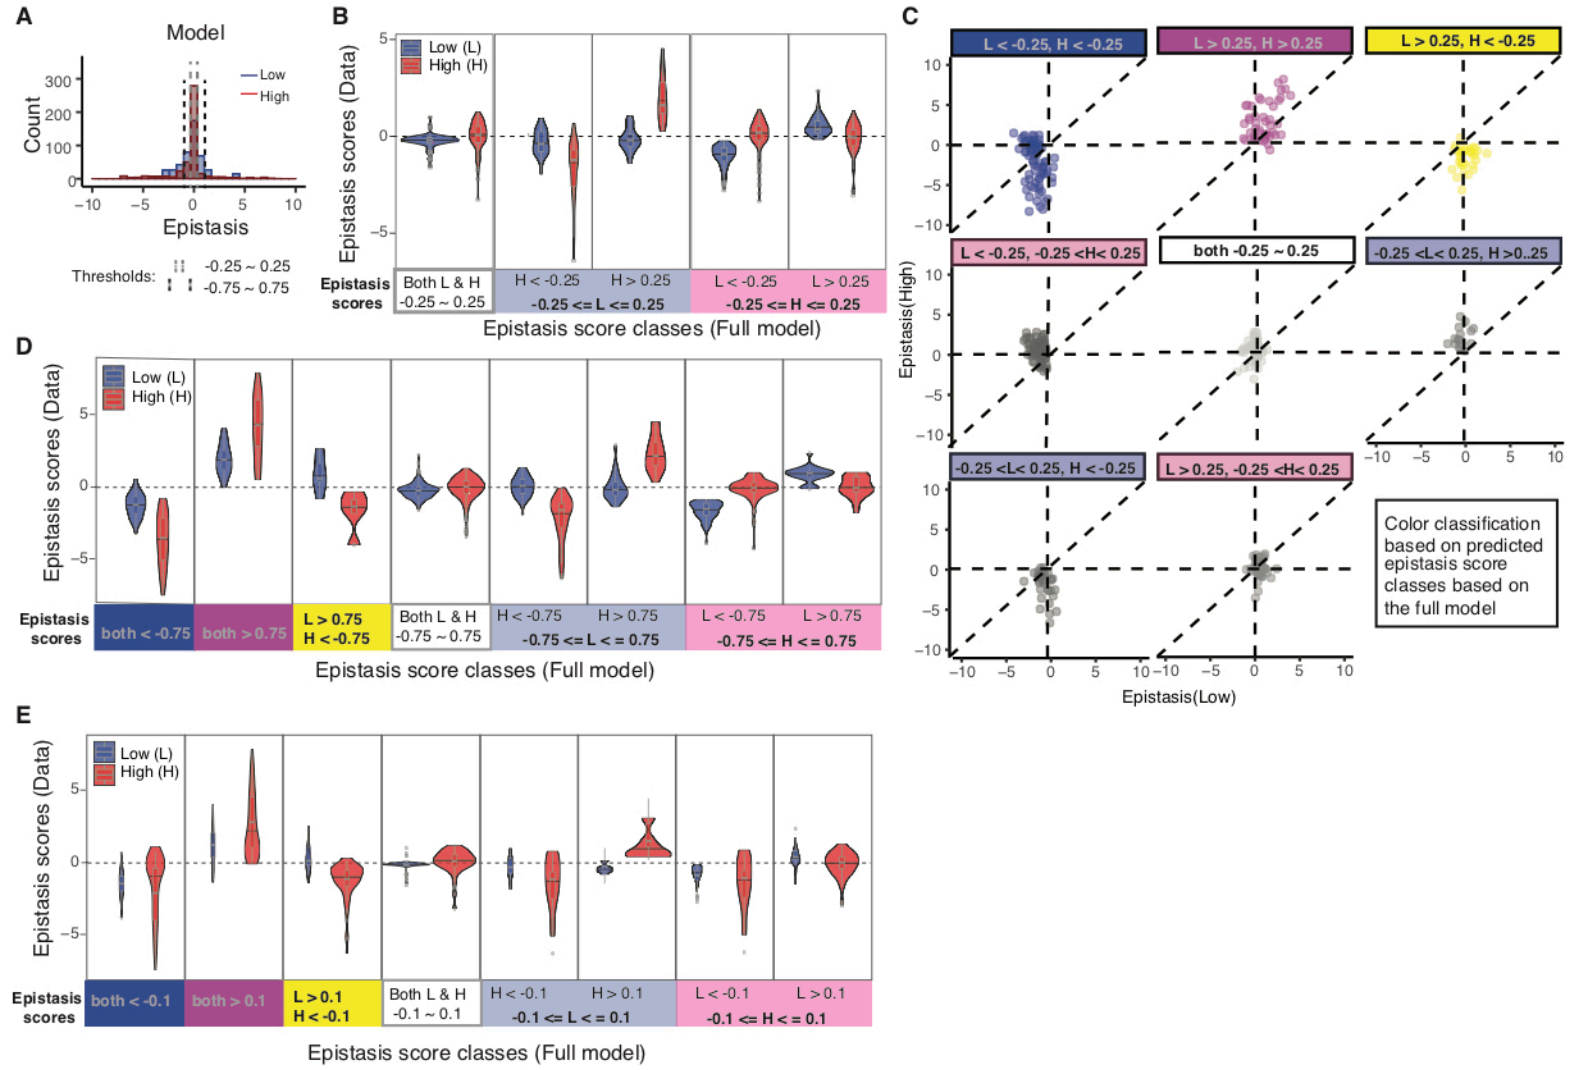

Figure S6

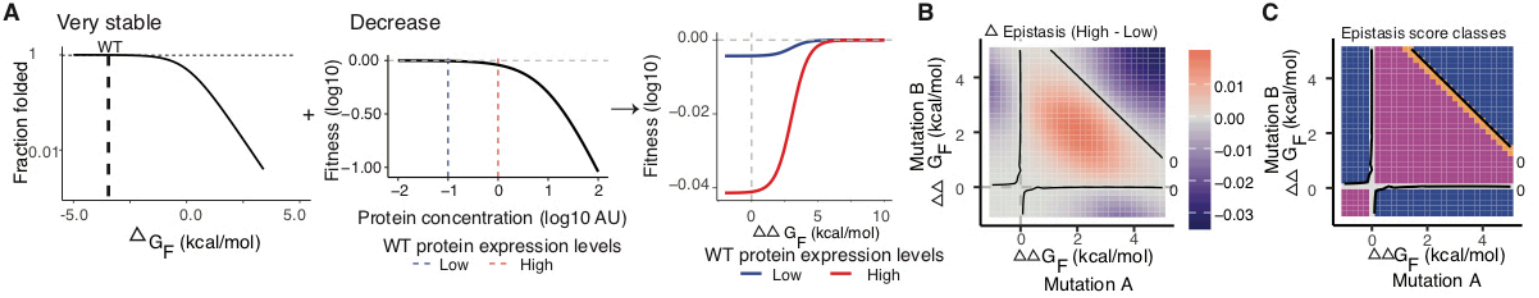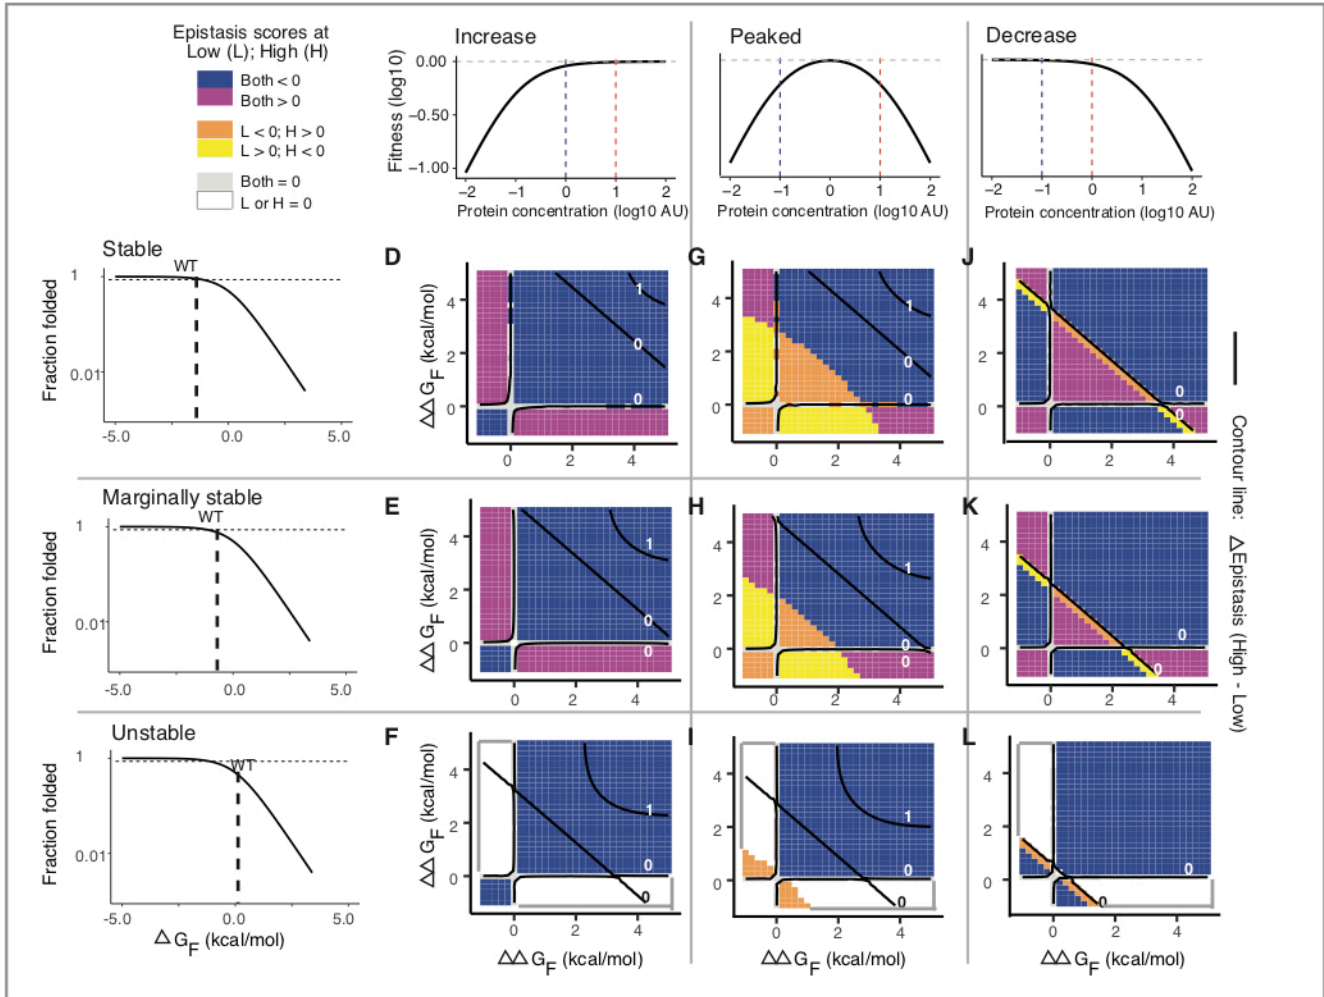

Figure S7

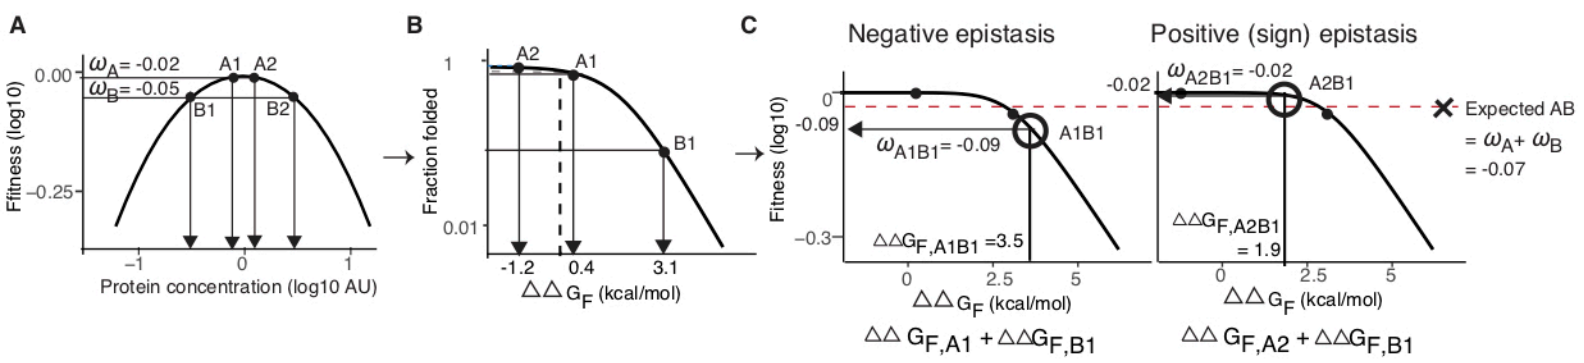

Figure S8



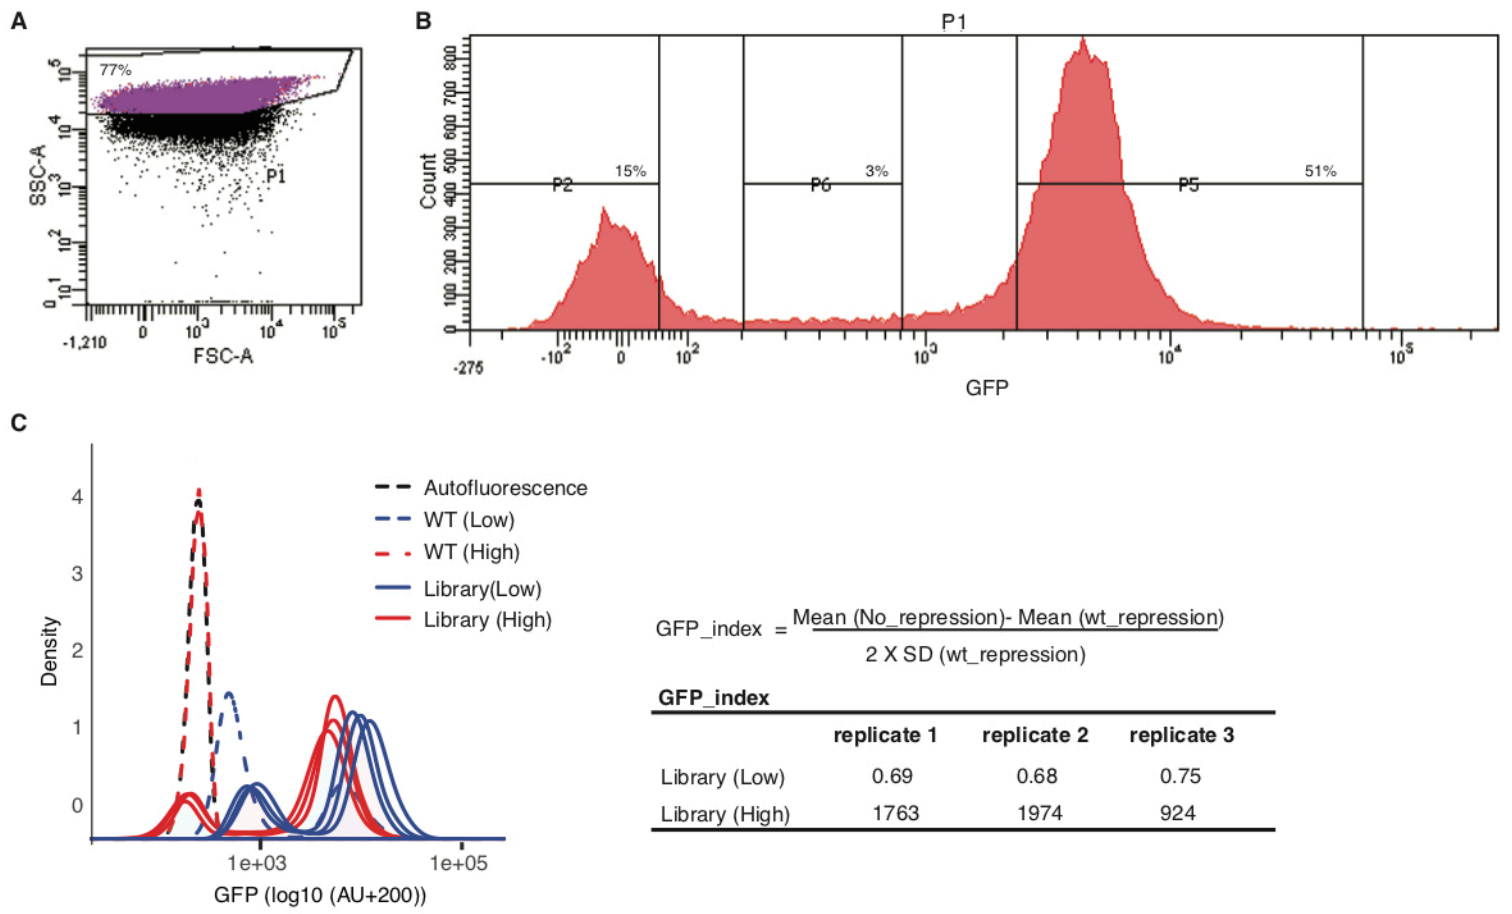

Figure S9

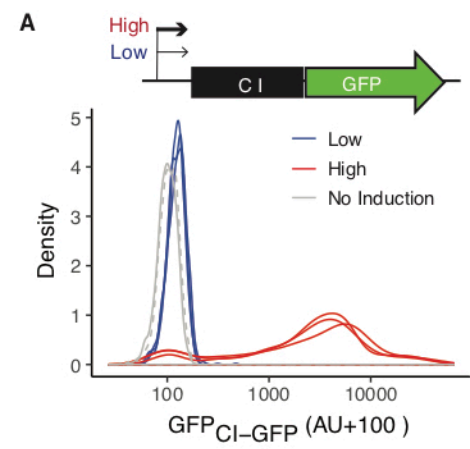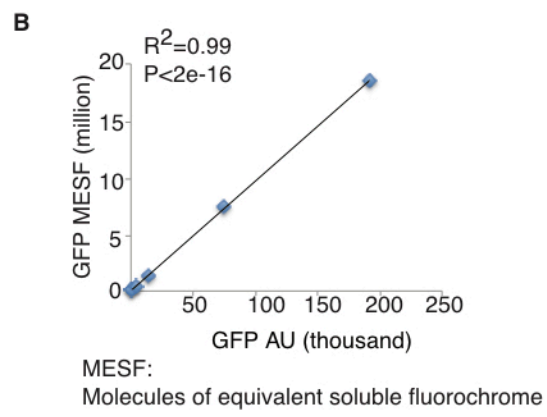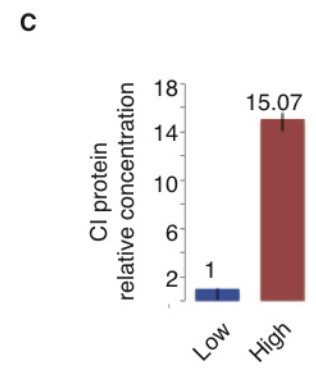

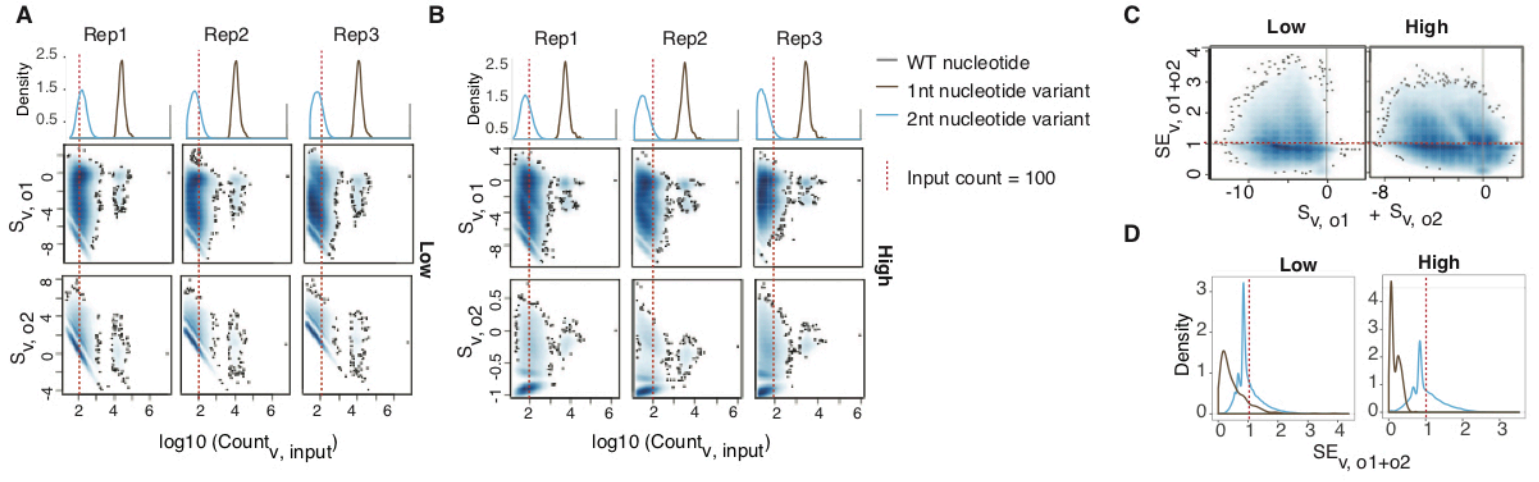

Figure S11

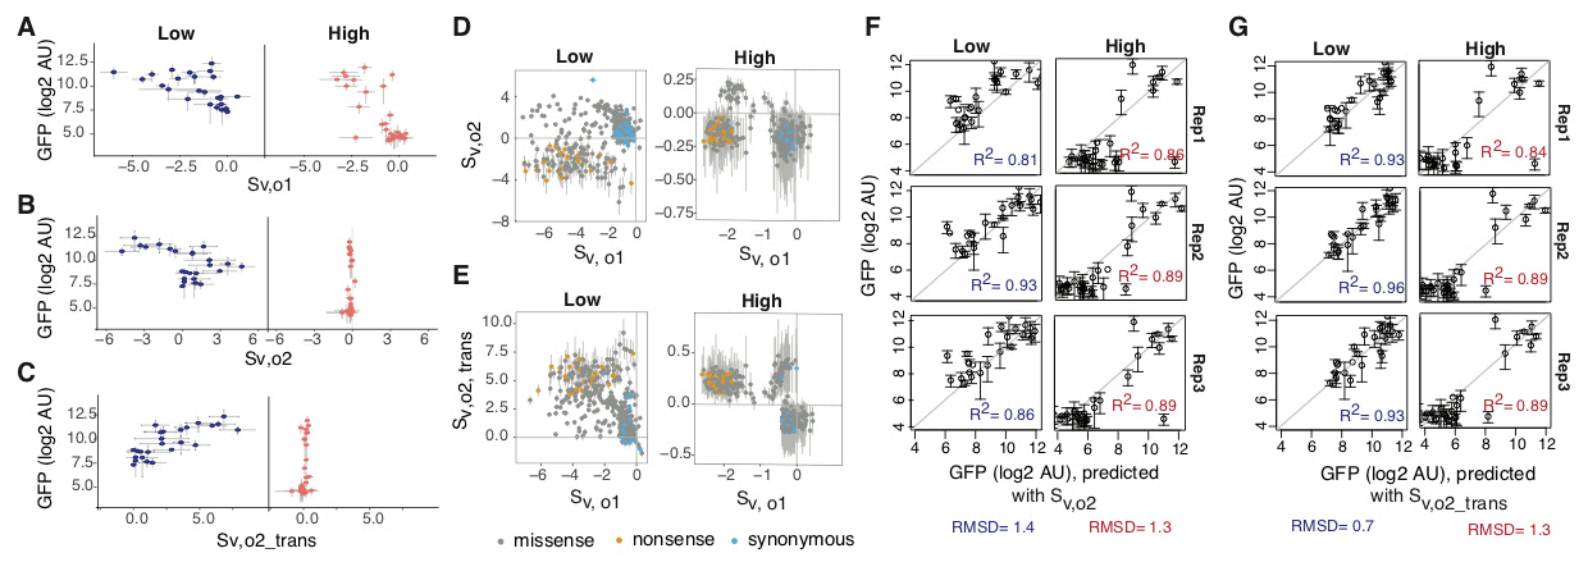

Figure S12

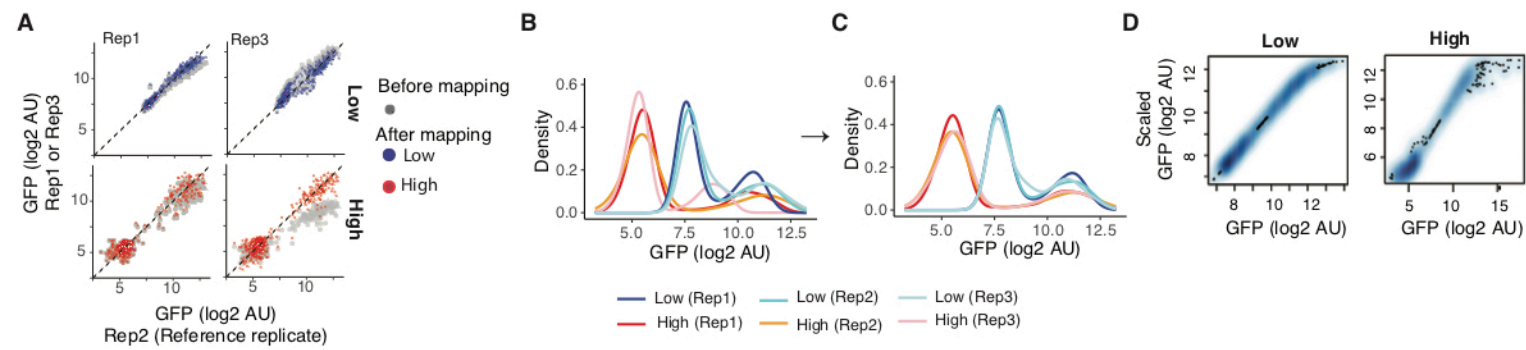

Figure S13

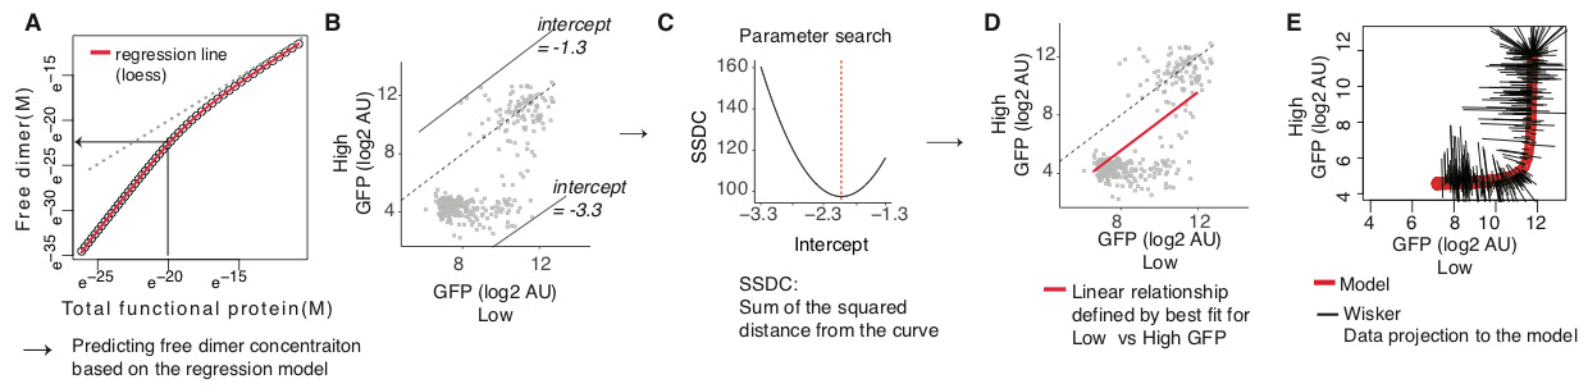

Figure S14
